# Supplementary material
Source: MDPI journal article supplement (https://www.mdpi.com/2311-5637/8/10/512)
Supplement: s1 [file s1]

# Co-Fermenting Pyrolysis Aqueous Condensate and Pyrolysis Syngas with Anaerobic Microbial Communities Enables L-Malate Production in a Secondary Fermentative Stage

Alberto Robazza <sup>1</sup>, Claudia Welter <sup>1</sup>, Christin Kubisch <sup>1</sup>, Flávio César Freire Baleeiro <sup>1,2</sup>, Katrin Ochsenreither <sup>1</sup>, Anke Neumann <sup>1,\*</sup>

<sup>1</sup> Institute of Process Engineering in Life Sciences 2: Technical Biology, Karlsruhe Institute of Technology –KIT, 76131 Karlsruhe, Germany

<sup>2</sup> Department of Environmental Microbiology, Helmholtz Centre for Environmental Research –UFZ, 04318 Leipzig, Germany

\* Correspondence: [anke.neumann@kit.edu](mailto:anke.neumann@kit.edu)

## Table of Content

|                                                                                                                                                                                                                  |                                     |
|------------------------------------------------------------------------------------------------------------------------------------------------------------------------------------------------------------------|-------------------------------------|
| Table S1. Conversion factors for carbon and electron balances.....                                                                                                                                               | 2                                   |
| Table S2. Productivities (mM/d) of selected metabolites calculated at 39 days EFT for bottles of the control experiments M-CTRL, T-CTRL, M-BES, T-BES. ....                                                      | 2                                   |
| Table S3. Acetate, propionate and n-butyrate productivities for all bottles of M-PAC and T-PAC experiments.....                                                                                                  | 3                                   |
| Table S4. Productivities of CO, CH <sub>4</sub> , H <sub>2</sub> CO <sub>2</sub> and VFAs in mM/d at increasing PAC concentrations and different temperatures. Negative productivity indicates consumption. .... | 4                                   |
| Figure S1. Cumulative CO uptake in mmol for experiments M-BES, M-CTRL and M-PAC. ....                                                                                                                            | 5                                   |
| Figure S2. Cumulative H <sub>2</sub> uptake in mmol for experiments M-BES, M-CTRL and M-PAC.....                                                                                                                 | 5                                   |
| Figure S3. Cumulative CO <sub>2</sub> production in mmol for experiments M-BES, M-CTRL and M-PAC. Negative values mean consumption. ....                                                                         | 6                                   |
| Figure S4. Cumulative CH <sub>4</sub> production in mmol for experiments M-BES, M-CTRL and M-PAC. ..                                                                                                             | <b>Error!</b>                       |
| <b>Bookmark not defined.</b>                                                                                                                                                                                     |                                     |
| Figure S5. Cumulative CO uptake in mmol for experiments T-BES, T-CTRL and T-PAC. ....                                                                                                                            | <b>Error!</b>                       |
| <b>Bookmark not defined.</b>                                                                                                                                                                                     |                                     |
| Figure S6. Cumulative H <sub>2</sub> uptake in mmol for experiments T-BES, T-CTRL and T-PAC. Negative values mean consumption. ....                                                                              | <b>Error! Bookmark not defined.</b> |
| Figure S7. Cumulative CO <sub>2</sub> production in mmol for experiments T-BES, T-CTRL and T-PAC. ....                                                                                                           | <b>Error!</b>                       |
| <b>Bookmark not defined.</b>                                                                                                                                                                                     |                                     |
| Figure S8. Cumulative CH <sub>4</sub> production in mmol for experiments T-BES, T-CTRL and T-PAC. ....                                                                                                           | 8                                   |

# 1. Analytical methods and calculations

**Table S1.** Conversion factors for carbon and electron balances.

| Compound           | Chemical Formula                              | Molecular Weight (g/mol) | mol C/mol | mol e <sup>-</sup> /mol |
|--------------------|-----------------------------------------------|--------------------------|-----------|-------------------------|
| Acetate            | C <sub>2</sub> H <sub>4</sub> O <sub>2</sub>  | 60.0                     | 2.0       | 8.0                     |
| Propionate         | C <sub>3</sub> H <sub>6</sub> O <sub>2</sub>  | 74.0                     | 3.0       | 14.0                    |
| Lactate            | C <sub>3</sub> H <sub>6</sub> O <sub>3</sub>  | 90.0                     | 3.0       | 12.0                    |
| L-Malate           | C <sub>4</sub> H <sub>6</sub> O <sub>5</sub>  | 134.1                    | 4.0       | 12.0                    |
| <i>n</i> -Butyrate | C <sub>4</sub> H <sub>8</sub> O <sub>2</sub>  | 88.0                     | 4.0       | 20.0                    |
| <i>n</i> -Valerate | C <sub>5</sub> H <sub>10</sub> O <sub>2</sub> | 102.1                    | 5.0       | 26.0                    |
| <i>n</i> -Caproate | C <sub>6</sub> H <sub>12</sub> O <sub>2</sub> | 116.1                    | 6.0       | 32.0                    |
| Heptanoate         | C <sub>7</sub> H <sub>14</sub> O <sub>2</sub> | 130.2                    | 7.0       | 38.0                    |
| Ethanol            | C <sub>2</sub> H <sub>6</sub> O               | 46.0                     | 2.0       | 12.0                    |
| Propanol           | C <sub>3</sub> H <sub>8</sub> O               | 60.1                     | 3.0       | 18.0                    |
| Butanol            | C <sub>4</sub> H <sub>10</sub> O              | 74.0                     | 4.0       | 24.0                    |
| Hydrogen           | H <sub>2</sub>                                | 2.0                      | 0.0       | 2.0                     |
| Carbon Monoxide    | CO                                            | 28.0                     | 1.0       | 2.0                     |
| Carbon Dioxide     | CO <sub>2</sub>                               | 44.0                     | 1.0       | 0.0                     |
| Methane            | CH <sub>4</sub>                               | 16.0                     | 1.0       | 8.0                     |

# 2. Mesophilic and thermophilic anaerobic mixed microbial cultures grown on pyrolysis synthetic syngas

**Table S2.** Productivities (mM/d) of selected metabolites calculated at 39 days EFT for bottles of the control experiments M-CTRL, T-CTRL, M-BES, T-BES. Gas productivities are the mean value of the productivities calculated between each sampling interval. C2-C6 metabolites productivities were calculated by dividing the net metabolite accumulation (mM) at the end of the fermentation by the total fermentative time. Not detected (nd).

|                           | M-CTRL |         | T-CTRL |         | M-BES |         | T-BES  |         |
|---------------------------|--------|---------|--------|---------|-------|---------|--------|---------|
|                           | Av.    | St.Dev. | Av.    | St.Dev. | Av.   | St.Dev. | Av.    | St.Dev. |
| CO [mM/d]                 | -8.17  | 0.45    | -34.30 | 1.02    | -7.68 | 0.59    | -28.70 | 1.60    |
| CH <sub>4</sub> [mM/d]    | 4.03   | 0.18    | 11.98  | 0.36    | nd    | nd      | nd     | nd      |
| H <sub>2</sub> [mM/d]     | -7.10  | 0.54    | -12.77 | 0.40    | -0.76 | 0.18    | 29.00  | 1.59    |
| CO <sub>2</sub> [mM/d]    | -1.13  | 0.06    | 23.11  | 0.94    | 2.16  | 0.20    | 27.36  | 1.38    |
| Lactate [mM/d]            | nd     | nd      | 0.01   | 0.01    | 0.01  | 0.00    | 0.01   | 0.01    |
| Acetate [mM/d]            | 0.33   | 0.05    | 0.23   | 0.07    | 0.95  | 0.04    | 0.67   | 0.09    |
| Propionate [mM/d]         | 0.03   | 0.02    | 0.07   | 0.03    | 0.20  | 0.04    | nd     | nd      |
| <i>n</i> -Butyrate [mM/d] | 0.01   | 0.01    | 0.05   | 0.03    | 0.18  | 0.01    | 0.01   | 0.01    |
| <i>n</i> -Valerate [mM/d] | nd     | nd      | nd     | nd      | 0.09  | 0.03    | nd     | nd      |
| <i>n</i> -Caproate [mM/d] | nd     | nd      | nd     | nd      | 0.05  | 0.01    | nd     | nd      |
| Ethanol [mM/d]            | 0.03   | 0.01    | 0.04   | 0.02    | 0.06  | 0.02    | 0.15   | 0.01    |
| Propanol [mM/d]           | nd     | nd      | nd     | nd      | 0.02  | 0.016   | nd     | nd      |
| Butanol [mM/d]            | nd     | nd      | nd     | nd      | 0.02  | 0.015   | nd     | nd      |

### 3. Co-fermentation of syngas and PAC

**Table S3.** Acetate, propionate and *n*-butyrate productivities for all bottles of M-PAC and T-PAC experiments. The productivities were calculated by dividing the net metabolite accumulation (mM) at the end of the fermentations by the total fermentative time (39 d).

|         | M-PAC             |                      |                              | T-PAC             |                      |                              |
|---------|-------------------|----------------------|------------------------------|-------------------|----------------------|------------------------------|
| PAC [%] | Acetate<br>[mM/d] | Propionate<br>[mM/d] | <i>n</i> -Butyrate<br>[mM/d] | Acetate<br>[mM/d] | Propionate<br>[mM/d] | <i>n</i> -Butyrate<br>[mM/d] |
| 0.5     | 0.93              | 0.18                 | 0.15                         | 0.17              | 0.08                 | 0.08                         |
| 1       | 0.85              | 0.23                 | 0.06                         | 0.05              | 0.12                 | 0.05                         |
| 1.5     | 0.87              | 0.22                 | 0.32                         | 0.63              | 0.13                 | 0.21                         |
| 2       | 0.73              | 0.47                 | 0.24                         | 1.68              | 0.04                 | 0.04                         |
| 2.5     | 0.85              | 0.18                 | 0.06                         | 1.67              | 0.10                 | 0.15                         |
| 3       | 0.73              | 0.23                 | 0.31                         | 1.48              | 0.04                 | 0.01                         |
| 3.5     | 0.89              | 0.11                 | 0.11                         | 2.33              | 0.08                 | 0.01                         |
| 4       | 0.92              | 0.07                 | 0.13                         | 1.68              | 0.09                 | 0.07                         |
| 5       | 0.90              | 0.18                 | 0.13                         | 1.17              | 0.07                 | 0.03                         |
| 7.5     | 0.80              | 0.14                 | 0.03                         | 0.69              | 0.11                 | 0.00                         |
| 10      | 0.25              | 0.05                 | 0.02                         | 0.23              | 0.00                 | 0.03                         |
| 15      | 0.06              | 0.00                 | 0.03                         | 0.06              | 0.00                 | 0.00                         |
| 20      | 0.00              | 0.00                 | 0.00                         | 0.00              | 0.00                 | 0.02                         |
| 30      | 0.03              | 0.00                 | 0.00                         | 0.00              | 0.00                 | 0.00                         |

**Table S4.** Productivities of CO, CH<sub>4</sub>, H<sub>2</sub>, CO<sub>2</sub> and VFAs in mM/d at increasing PAC concentrations and different temperatures. Negative productivity indicates consumption. Gas productivities are the mean value of the productivities calculated between each sampling interval. The VFAs productivities were calculated by dividing the net metabolite accumulation (mM) at the end of the fermentations by the total fermentative time.

| PAC [%]                                | 0.5    | 1      | 1.5    | 2      | 2.5    | 3      | 3.5   | 4     | 5     | 7.5   | 10    | 15    | 20    | 30    |
|----------------------------------------|--------|--------|--------|--------|--------|--------|-------|-------|-------|-------|-------|-------|-------|-------|
| PAC availability [gCOD/gVSS]           | 0.103  | 0.206  | 0.309  | 0.413  | 0.516  | 0.619  | 0.722 | 0.825 | 1.032 | 1.547 | 2.063 | 3.095 | 4.127 | 6.190 |
| Mesophilic PAC Fermentations (M-PAC)   |        |        |        |        |        |        |       |       |       |       |       |       |       |       |
| CO productivity [mM/d]                 | -23.59 | -17.77 | -15.33 | -4.43  | -1.87  | -1.22  | -1.24 | -1.56 | -0.94 | -1.35 | -0.39 | -0.40 | -0.38 | -0.34 |
| CH <sub>4</sub> productivity [mM/d]    | 5.73   | 3.97   | 2.09   | 0.13   | 0.05   | 0.00   | 0.00  | 0.00  | 0.00  | 0.00  | 0.00  | 0.00  | 0.00  | 0.00  |
| H <sub>2</sub> productivity [mM/d]     | -8.52  | -6.08  | -6.12  | -0.80  | -0.21  | -0.11  | -0.47 | -0.29 | -0.14 | -0.21 | -0.11 | -0.11 | -0.09 | -0.07 |
| CO <sub>2</sub> productivity [mM/d]    | 8.81   | 6.50   | 3.95   | 1.65   | 0.88   | 0.62   | 0.65  | 0.67  | 0.72  | 0.76  | 0.28  | 0.27  | 0.22  | 0.35  |
| VFAs productivity [mM/d]               | 1.26   | 1.15   | 1.40   | 1.44   | 1.10   | 1.27   | 1.11  | 1.12  | 1.21  | 0.97  | 0.32  | 0.10  | 0.00  | 0.033 |
| CO uptake norm. to M-CTRL [%]          | 231.5  | 151.3  | 141.1  | 50.15  | 23.91  | 16.03  | 15.74 | 18.95 | 15.74 | 8.45  | 4.37  | 4.37  | 4.96  | 3.79  |
| C-mol balance [%]                      | 76.7   | 82.5   | 75.0   | 131.6  | 246.1  | 293.2  | 246.2 | 207.7 | 270.4 | 265.4 | 297.1 | 163.2 | 146.4 | 151.4 |
| e-mol balance [%]                      | 94.5   | 99.5   | 93.1   | 173.7  | 384.6  | 477.0  | 290.0 | 286.8 | 473.6 | 292.2 | 308.6 | 124.6 | -     | -     |
| Thermophilic PAC Fermentations (T-PAC) |        |        |        |        |        |        |       |       |       |       |       |       |       |       |
| CO productivity [mM/d]                 | -33.57 | -34.85 | -36.05 | -14.74 | -12.21 | -12.33 | -9.10 | -9.02 | -3.83 | -0.59 | -0.36 | -0.36 | -0.38 | -0.15 |
| CH <sub>4</sub> productivity [mM/d]    | 10.37  | 12.59  | 12.33  | 2.03   | 0.12   | 0.02   | 0.00  | 0.00  | 0.00  | 0.00  | 0.00  | 0.00  | 0.00  | 0.00  |
| H <sub>2</sub> productivity [mM/d]     | -12.44 | -12.66 | -12.68 | 4.99   | 4.79   | 13.09  | 8.22  | 9.18  | 3.82  | 0.44  | 0.28  | 0.20  | 0.13  | 0.05  |
| CO <sub>2</sub> productivity [mM/d]    | 22.18  | 24.51  | 25.10  | 10.01  | 8.50   | 12.69  | 8.31  | 8.71  | 3.83  | 0.94  | 0.53  | 0.42  | 0.38  | 0.16  |
| VFAs productivity [mM/d]               | 0.33   | 0.22   | 0.96   | 1.76   | 1.91   | 1.53   | 2.42  | 1.84  | 1.27  | 0.80  | 0.26  | 0.06  | 0.02  | 0.00  |
| CO uptake norm. to T-CTRL [%]          | 97.56  | 101.3  | 104.8  | 36.70  | 34.80  | 35.48  | 26.00 | 27.15 | 15.03 | 1.56  | 1.02  | 0.81  | 1.22  | 0.41  |
| C-mol [%]                              | 100.0  | 108.3  | 109.9  | 109.7  | 102.2  | 122.5  | 140.3 | 134.5 | 142.4 | 436.0 | 279.4 | 147.8 | 111.6 | 113.5 |
| e-mol balance [%]                      | 96.1   | 109.7  | 115.3  | 121.3  | 89.5   | 126.8  | 141.4 | 138.3 | 189.1 | 618.5 | 365.2 | 122.8 | -     | -     |

### 3.1. Impact of PAC on the syngas metabolism of an anaerobic mixed culture at mesophilic temperature (37°C)

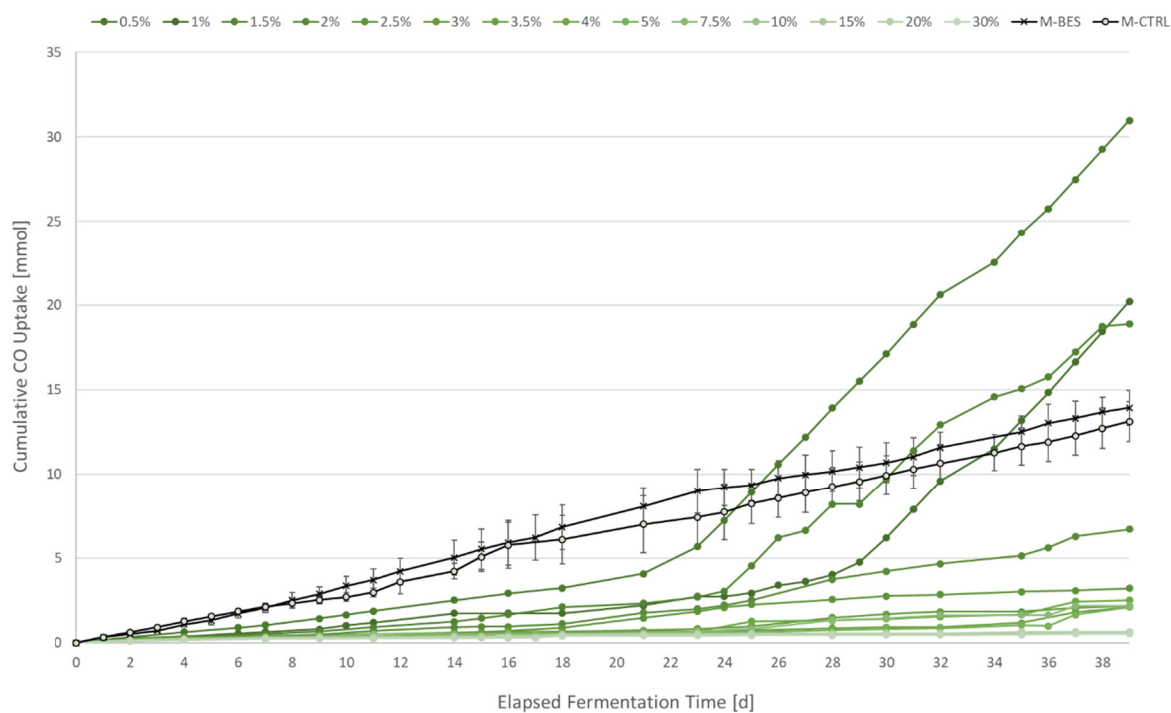

**Figure S1.** Cumulative CO uptake in mmol for experiments M-BES, M-CTRL and M-PAC.

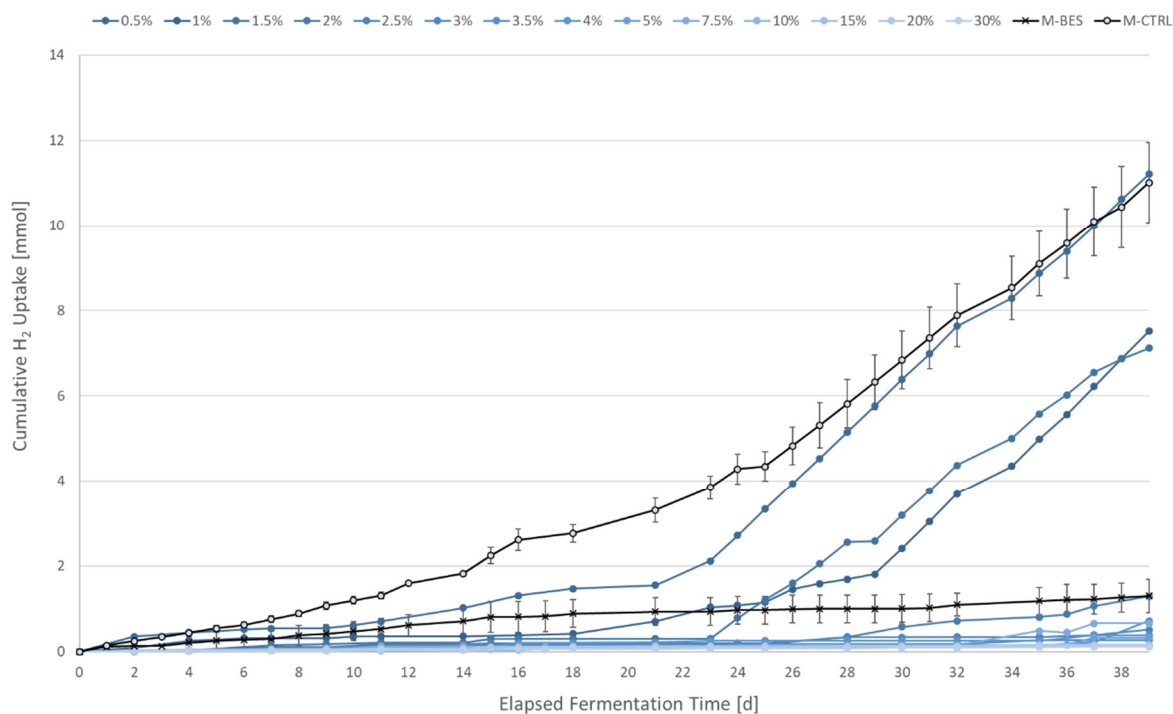

**Figure S2.** Cumulative H<sub>2</sub> uptake in mmol for experiments M-BES, M-CTRL and M-PAC.

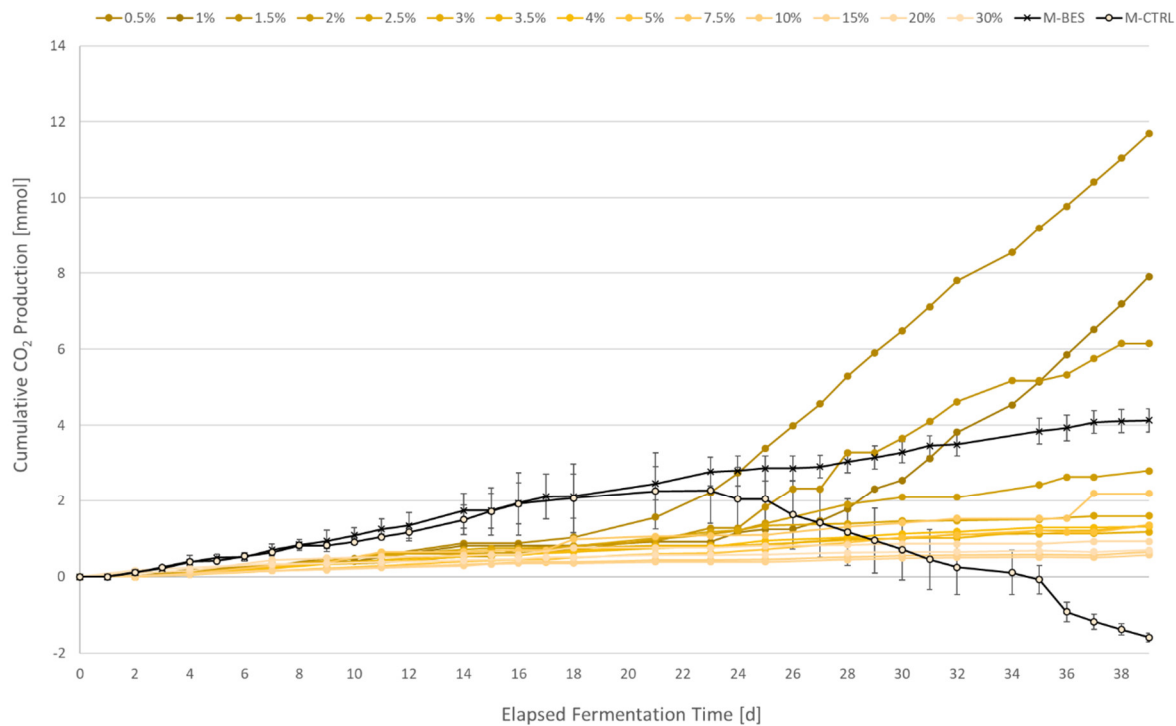

**Figure S3.** Cumulative CO<sub>2</sub> production in mmol for experiments M-BES, M-CTRL and M-PAC. Negative values mean consumption.

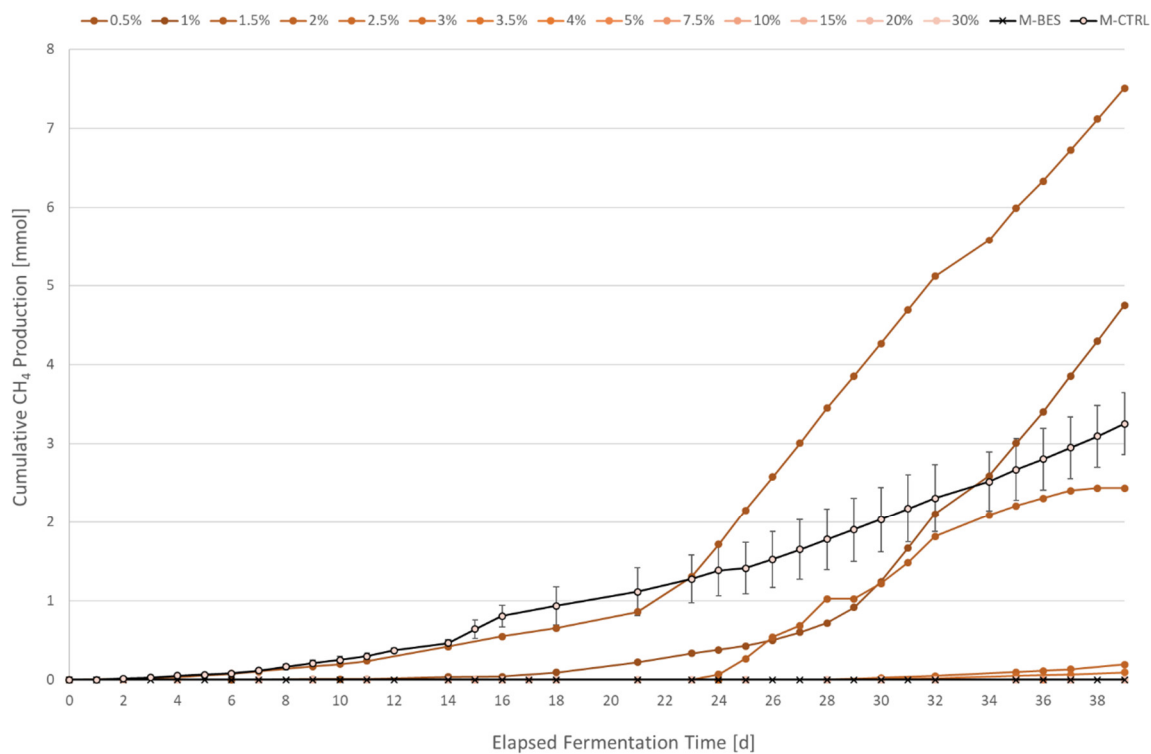

**Figure S4.** Cumulative CH<sub>4</sub> production in mmol for experiments M-BES, M-CTRL and M-PAC.

### 3.2. Impact of PAC on the syngas metabolism of an anaerobic mixed culture at thermophilic temperature (55°C)

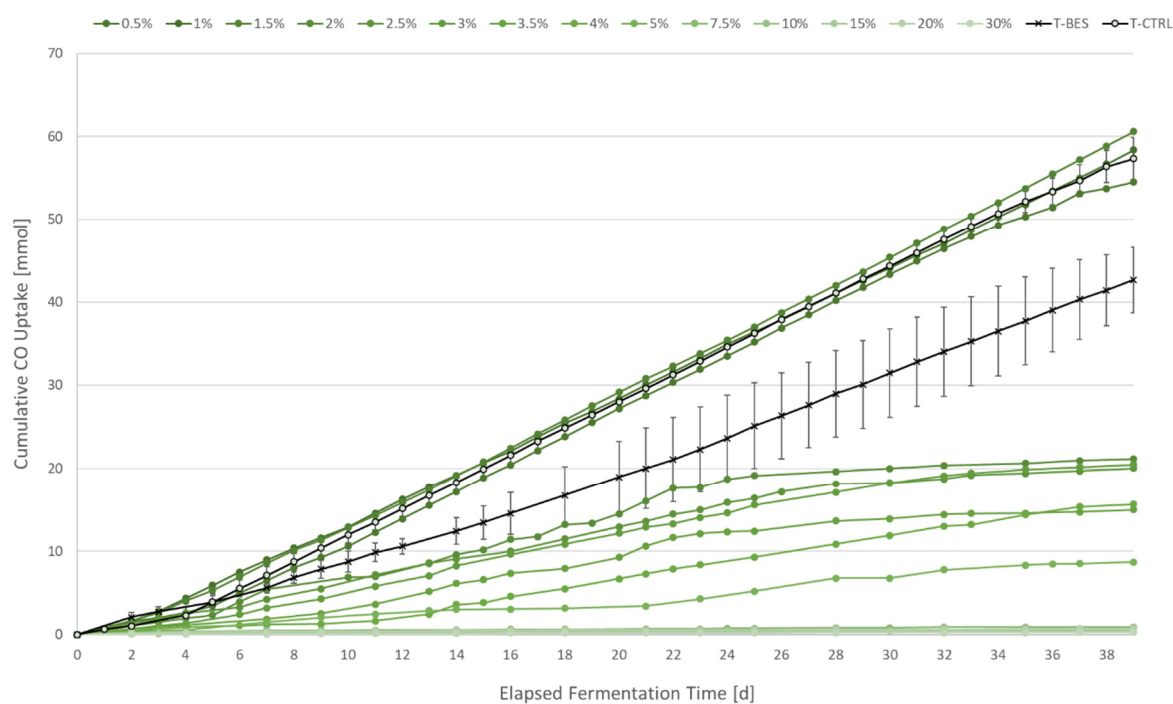

**Figure S5.** Cumulative CO uptake in mmol for experiments T-BES, T-CTRL and T-PAC.

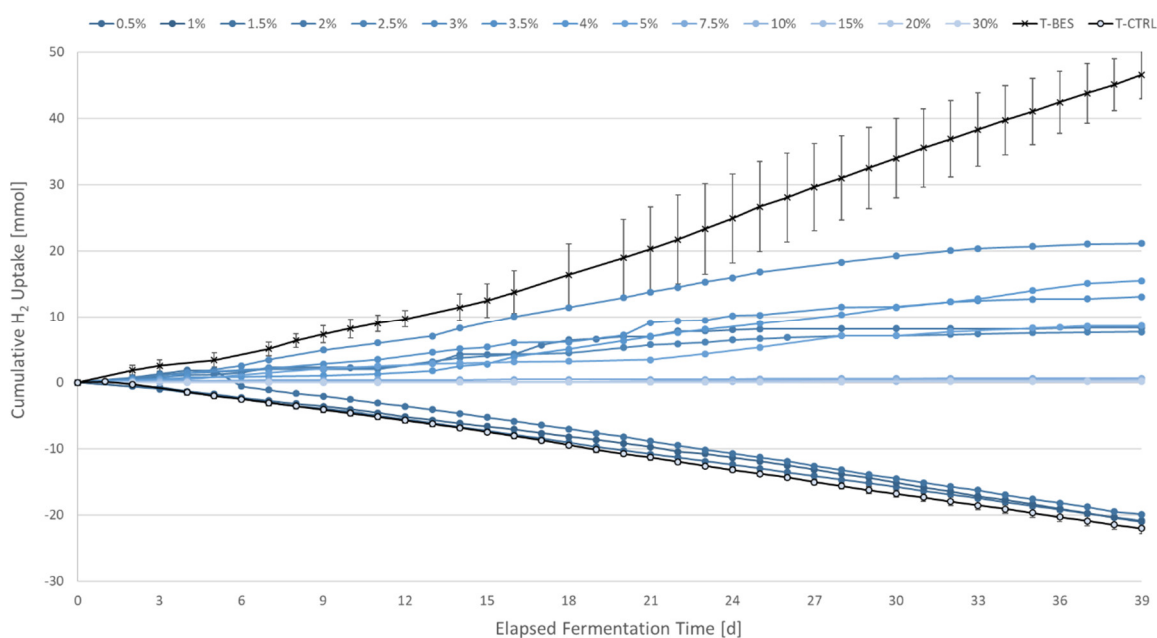

**Figure S6.** Cumulative H<sub>2</sub> uptake in mmol for experiments T-BES, T-CTRL and T-PAC. Negative values mean consumption.

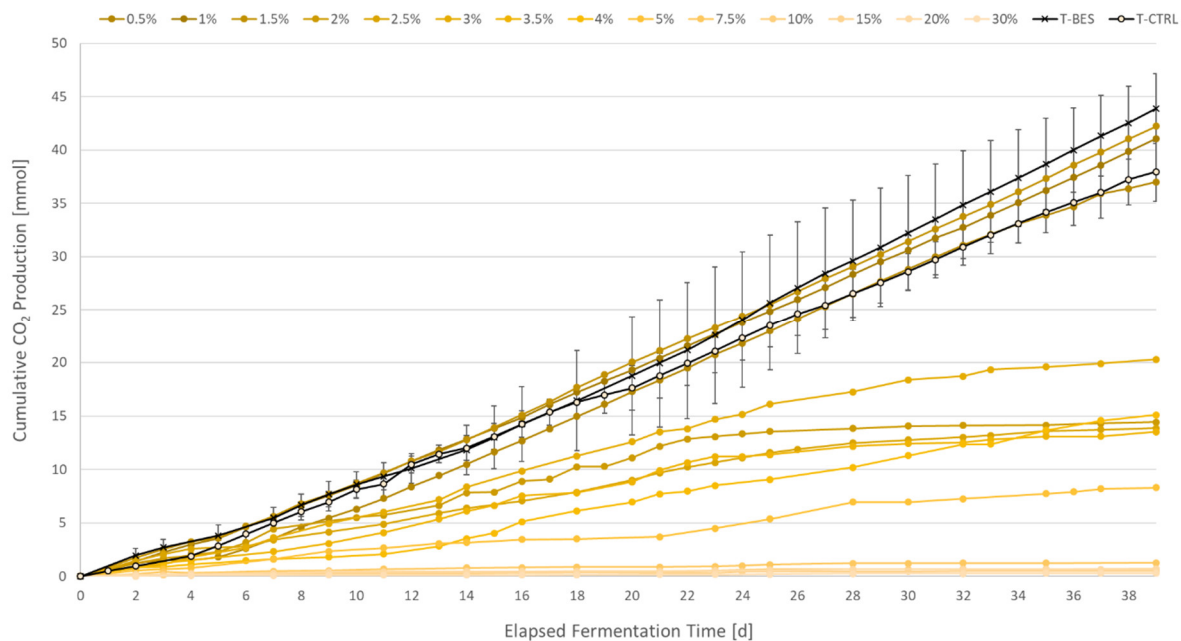

**Figure S7.** Cumulative CO<sub>2</sub> production in mmol for experiments T-BES, T-CTRL and T-PAC.

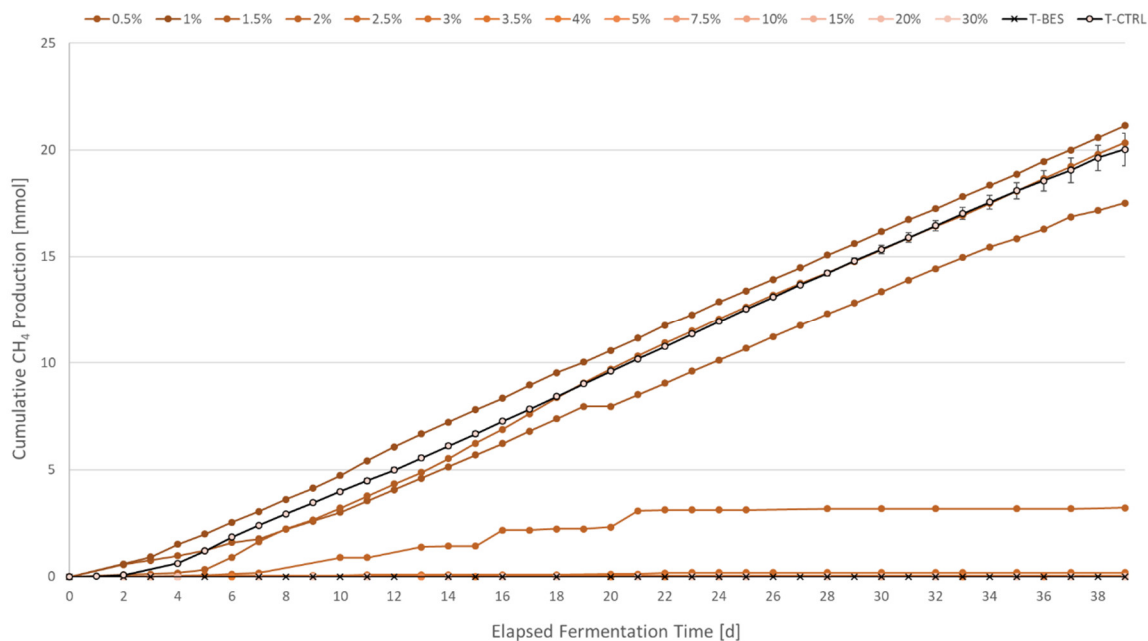

**Figure S8.** Cumulative CH<sub>4</sub> production in mmol for experiments T-BES, T-CTRL and T-PAC.
